# Supplementary material for: Elucidation of 4-Hydroxybenzoic Acid Catabolic Pathways in Pseudarthrobacter phenanthrenivorans Sphe3
Source: MDPI journal article supplement (doi:10.3390/ijms25020843), 2024-01-10
Supplement: s1 [file s1]

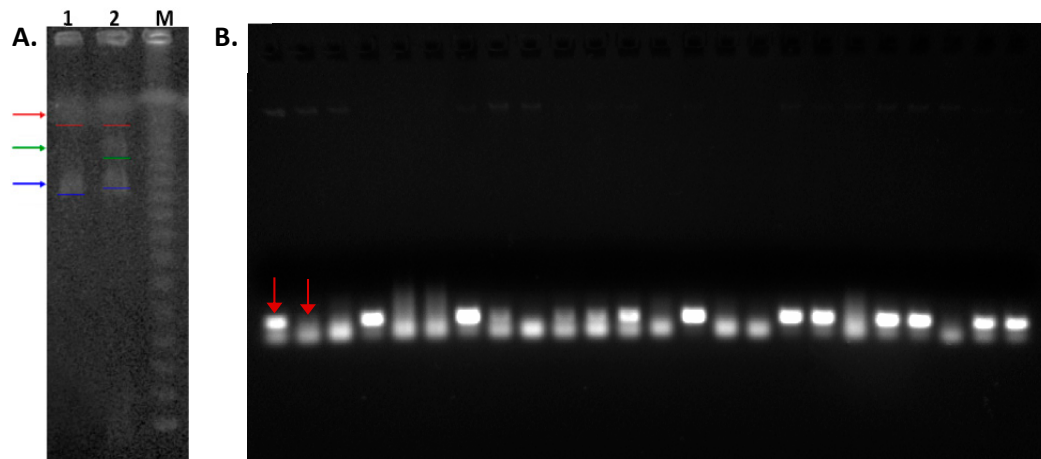

**Figure S1: A. Pulsed field electrophoresis agarose gel from Sphe and Sphe3c cells.** 1: DNA from the mutant Sphe3c cells; 2: DNA from the wild-type Sphe3 cells; M:  $\lambda$ DNA ladder (Chef DNA Size Standard, 48.5-1000 kb, Bio-Rad). Red arrow and lines designate the chromosomal DNA band, green arrow and line designate the pASPHE301 plasmid bands and blue designates the pASPHE302 plasmid bands. It is obvious that the band corresponding to pASPHE301 plasmid is not present in the DNA extracted from the mutant strain, Sphe3c. **B. Agarose gel electrophoresis for PCR products with primers specific for the gene of catechol 2,3-dioxygenase.** The gene for catechol 2,3-dioxygenase is unique for the pASPHE301 plasmid and the absence of a PCR product indicates the loss of the plasmid. The primers used are the primers used for the RT-PCR experiments. The template DNA was extracted from Sphe3 cells at the end of plasmid-curing procedure.

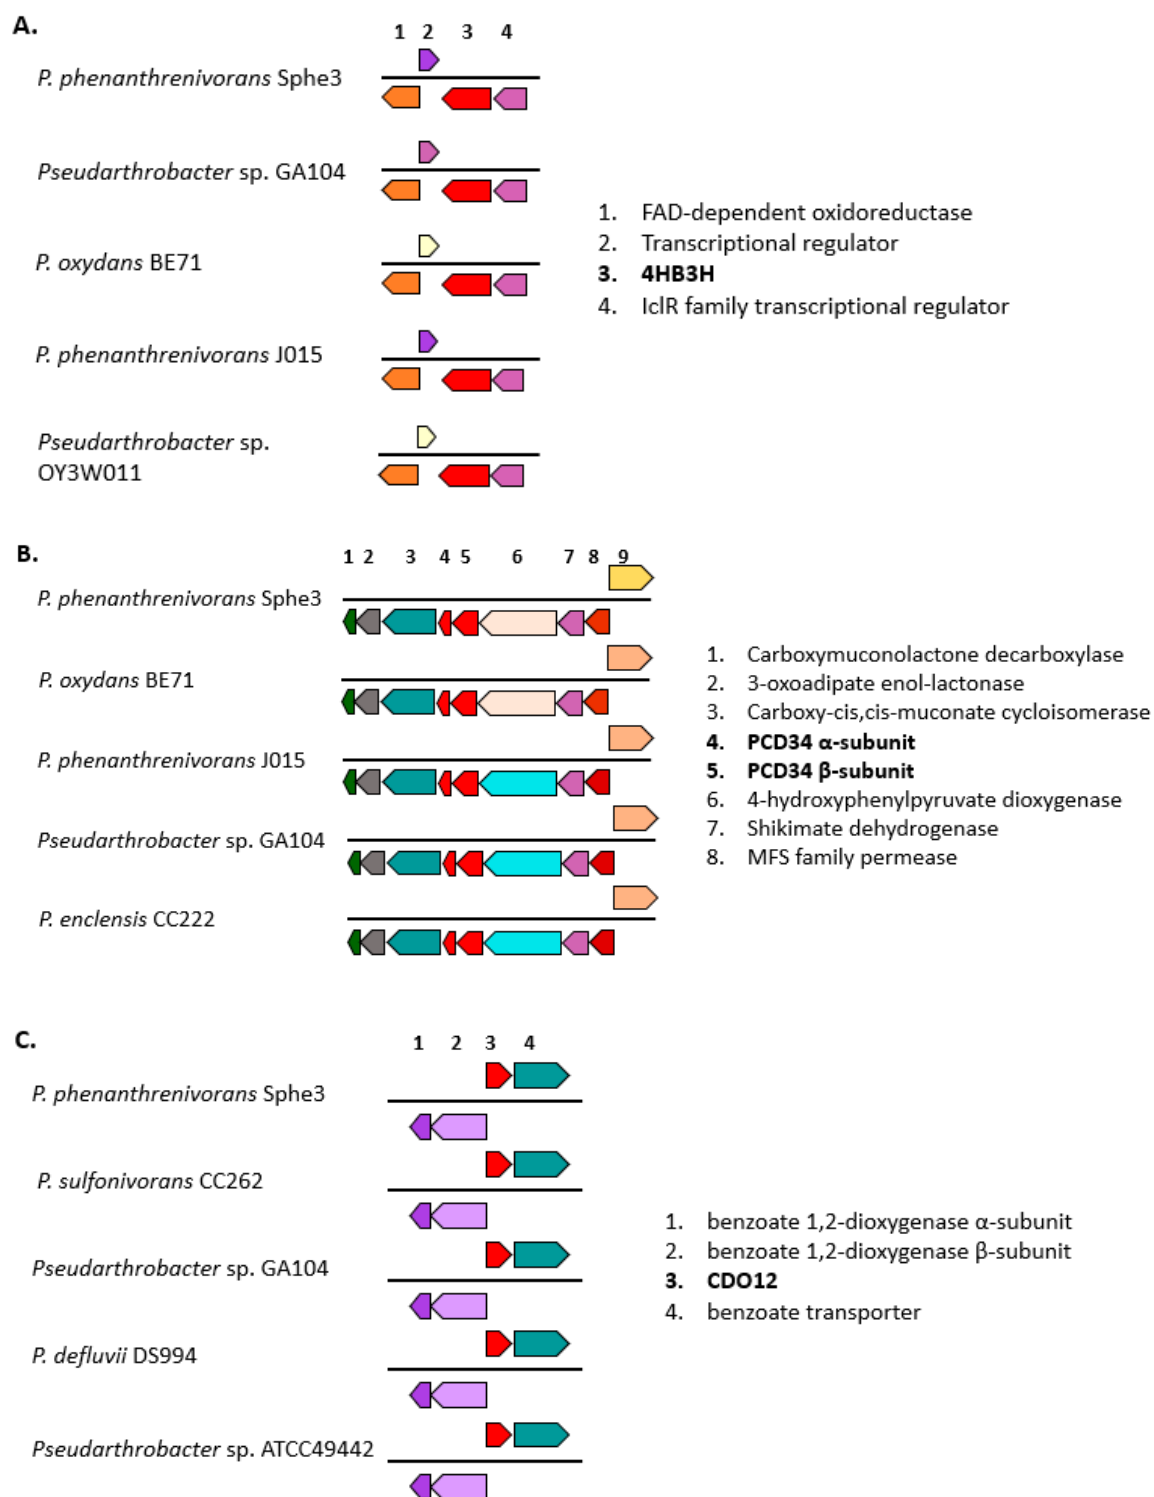

**Figure S2: Graphical representation of catabolic gene clusters of Sphe3 involved in 4-HBA catabolism, in alignment with the respective areas in other *Pseudarthrobacter* species.** The gene of interest is colored in red. There are no data for PCA 4,5-dioxygenase (PCD45) and catechol 2,3-dioxygenase (CDO23) for other *Pseudarthrobacter* according to JGI database. The clusters depicted are of **A.** 4-hydroxybenzoate-3-hydroxylase (4HB3H), **B.** PCA 3,4-dioxygenase (PCD34) and **C.** catechol 1,2-dioxygenase (CDO12). The data were extracted from the Joint Genomic Institute (JGI) database (<https://img.jgi.doe.gov/cgi-bin/m/main.cgi?section=GeneSearch&page=searchForm>).

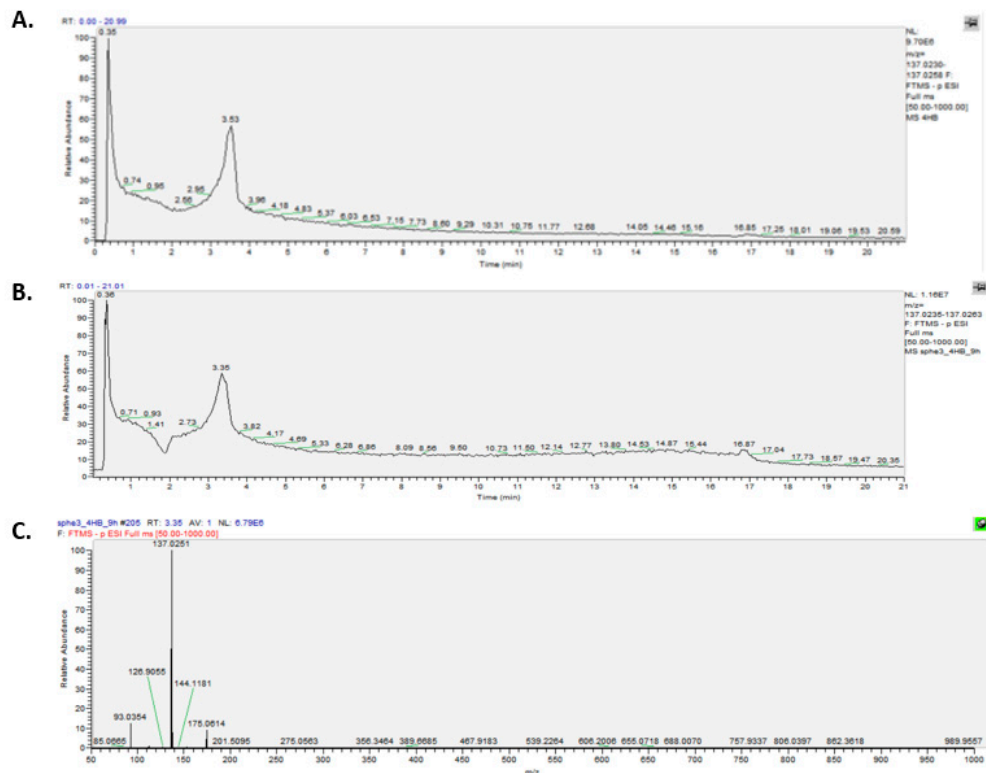

**Figure S3: A.** Chromatogram of the 4-HBA standard (R.T. = 3.53 min); **B.** Chromatogram of the compound identified as 4-HBA (R.T. = 3.35 min) in Sphe3 and Sphe3c cultures in 4-HBA; **C.** MS spectrum of  $m/z = 137.0244$ .

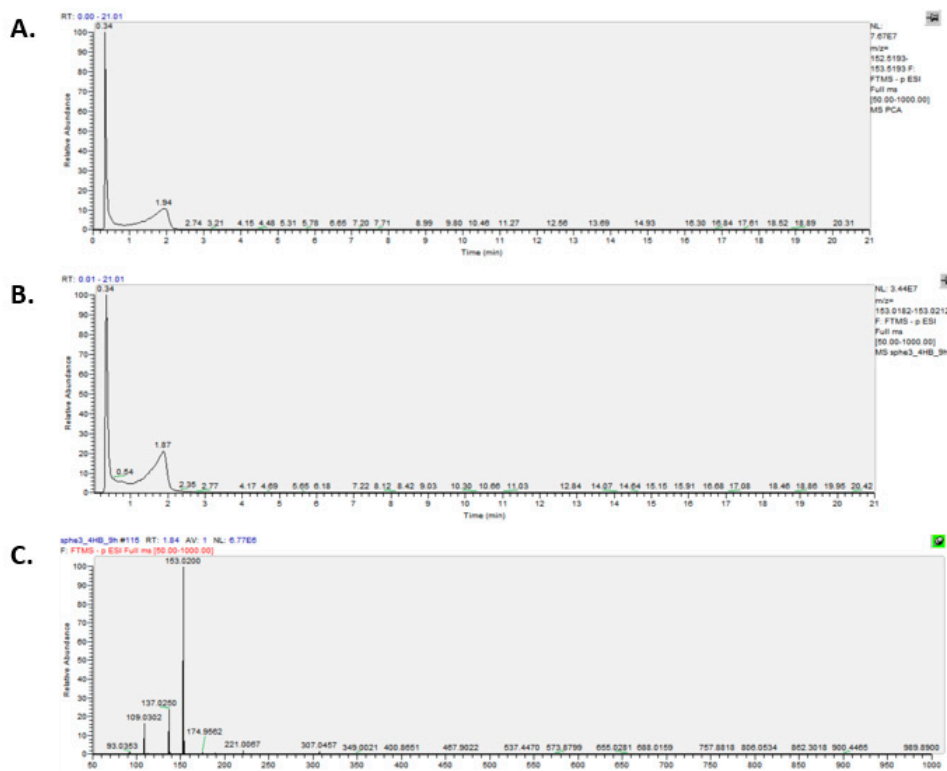

**Figure S4: A.** Chromatogram of the PCA standard (R.T. = 1.94 min); **B.** Chromatogram of the compound identified as PCA (R.T. = 1.88 min) in Sphe3 and Sphe3c cultures in 4-HBA; **C.** MS spectrum of  $m/z = 153.0193$ .

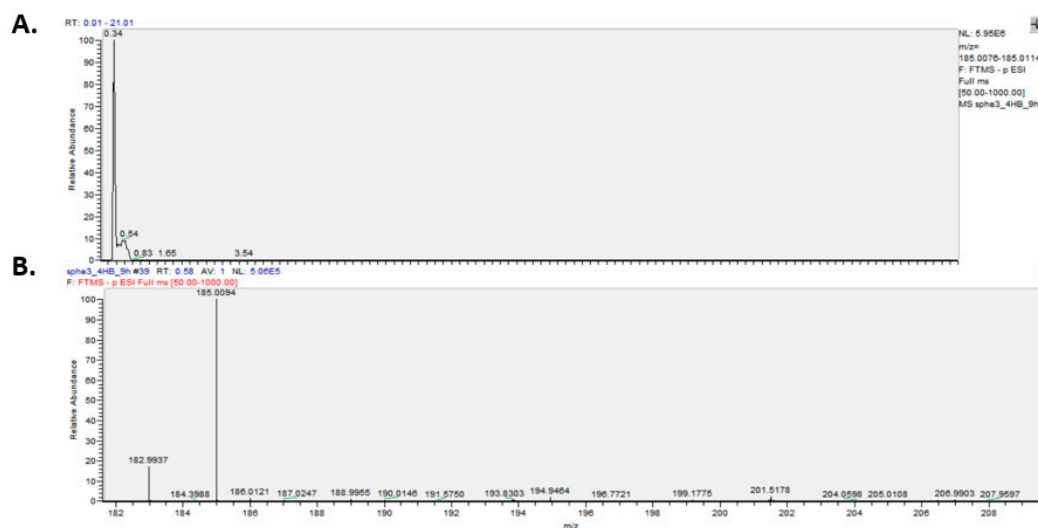

**Figure S5: A.** Chromatogram of the compound with  $m/z = 185.0091$  (R.T. = 0.54 min) in Sphe3 and Sphe3c cultures in 4-HBA; **B.** MS spectrum of the compound.

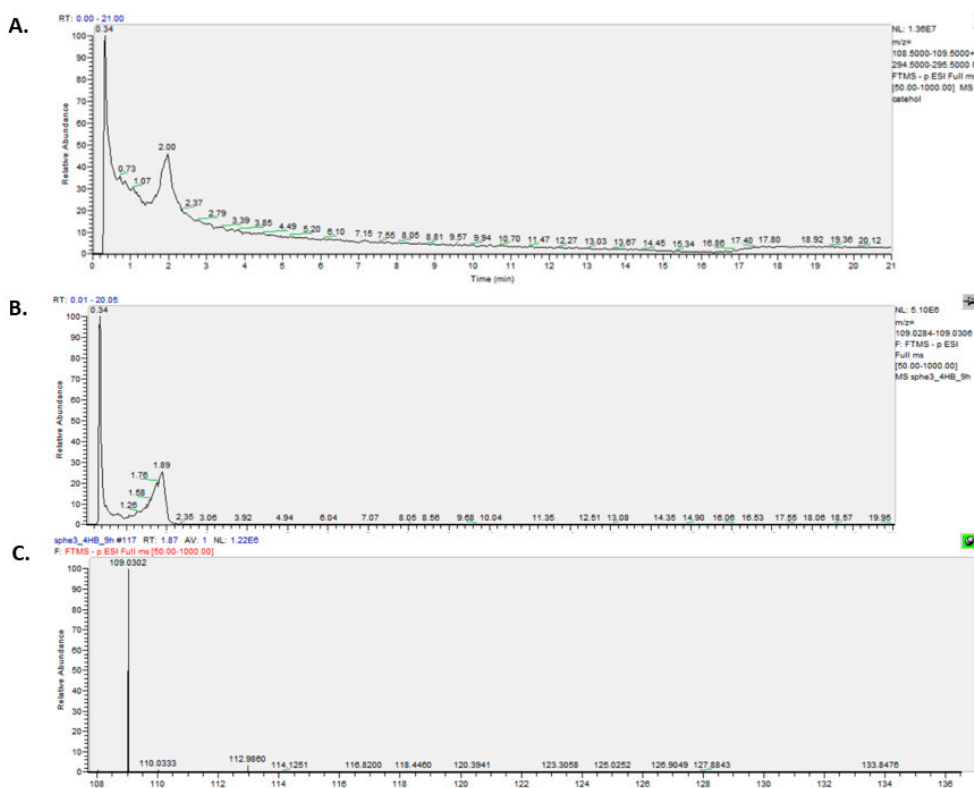

**Figure S6:** **A.** Chromatogram of the catechol standard (R.T. = 2 min); **B.** Chromatogram of the compound identified as catechol (R.T. = 1.89 min) in Sphe3 and Sphe3c cultures in 4-HBA; **C.** MS spectrum of  $m/z = 109.0295$ .

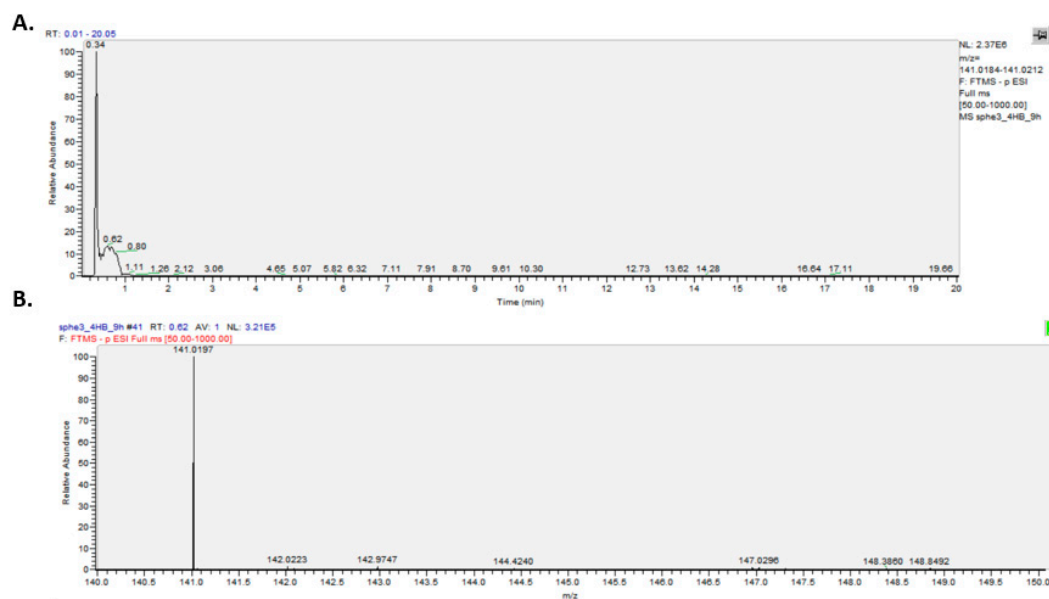

**Figure S7:** **A.** Chromatogram of the compound with  $m/z = 141.0193$  (R.T. = 1.34 min) in Sphe3 and Sphe3c cultures in 4-HBA; **B.** MS spectrum of the compound.

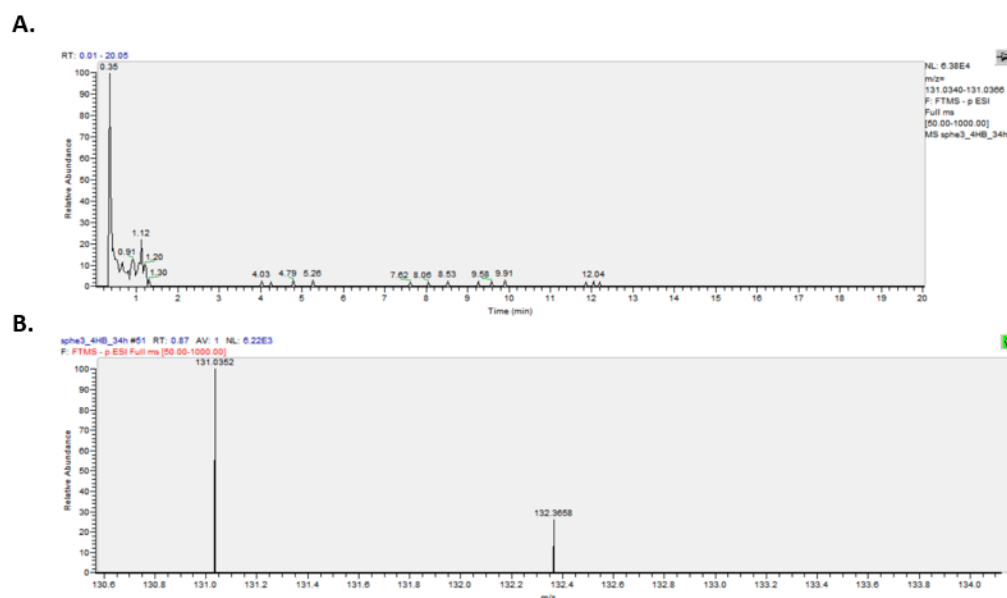

**Figure S8:** **A.** Chromatogram of the compound with  $m/z = 131.0357$  (R.T. = 1.2 min) in Sphe3 and Sphe3c cultures in 4-HBA, identified as 4-hydroxy-2-oxopentanoate based on the  $m/z$  value; **B.** MS spectrum of the compound.

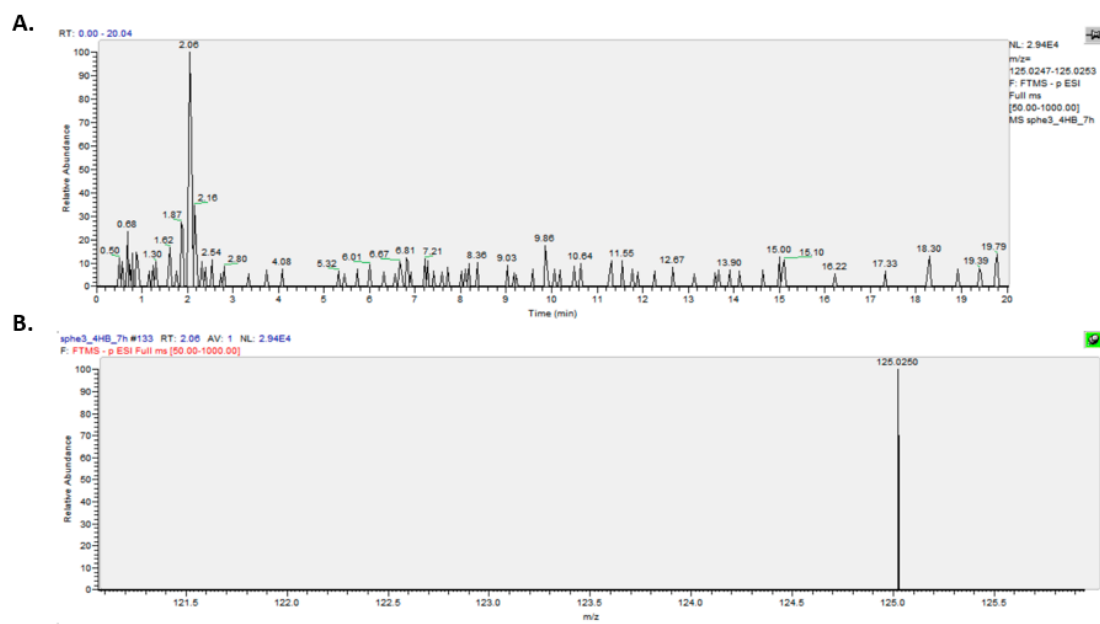

**Figure S9: A.** Chromatogram of the compound with  $m/z = 125.025$  (R.T. = 2 min) in Sphe3 and Sphe3c cultures in 4-HBA, identified as hydroxyquinol based on the  $m/z$  value; **B.** MS spectrum of the compound.

**Table S1: BLASTP search of enzymes that could be involved in 4-HBA degradation by *P. phenanthrenivorans* Sphe3.**

| Locus Tag    | Description                        | Location   | Microorganism                            | Query Coverage (%) | Per. Identity (%) | Length (aa) | Accession No.  |
|--------------|------------------------------------|------------|------------------------------------------|--------------------|-------------------|-------------|----------------|
| Asphe3_38690 | 4-hydroxybenzoate-3-monooxygenase  | chromosome | <i>Pseudarthrobacter</i> sp. L1SW        | 100                | 95.44             | 395         | WP_228404732.1 |
|              |                                    |            | <i>Pseudarthrobacter oxydans</i>         | 100                | 95.18             | 395         | WP_310113027.1 |
|              |                                    |            | <i>Pseudarthrobacter scleromae</i>       | 99                 | 95.43             | 395         | WP_188728301.1 |
|              |                                    |            | <i>Pseudarthrobacter polychromogenes</i> | 99                 | 94.92             | 395         | WP_188810805.1 |
|              |                                    |            | <i>Pseudarthrobacter siccitolerans</i>   | 99                 | 94.9              | 396         | WP_050057210.1 |
|              |                                    |            | <i>Pseudarthrobacter equi</i>            | 99                 | 93.4              | 395         | WP_091716793.1 |
| Asphe3_38850 | PCA 3,4-dioxygenase, alpha subunit | chromosome | <i>Pseudarthrobacter oxydans</i>         | 100                | 94.12             | 187         | WP_174177761.1 |
|              |                                    |            | <i>Pseudarthrobacter scleromae</i>       | 100                | 93.58             | 187         | WP_188728336.1 |
|              |                                    |            | <i>Pseudarthrobacter equi</i>            | 100                | 92.51             | 187         | WP_091716828.1 |
|              |                                    |            | <i>Arthrobacter ulcerisalmonis</i>       | 97                 | 93.99             | 185         | WP_306629419.1 |
|              |                                    |            | <i>Pseudarthrobacter enclensis</i>       | 97                 | 93.44             | 185         | WP_141944929.1 |
|              |                                    |            | <i>Arthrobacter oryzae</i>               | 97                 | 92.9              | 185         | WP_306968265.1 |

|              |                                   |            |                                           |     |       |     |                |
|--------------|-----------------------------------|------------|-------------------------------------------|-----|-------|-----|----------------|
| Asphe3_38860 | PCA 3,4-dioxygenase, beta subunit | chromosome | <i>Pseudarthrobacter scleromae</i>        | 100 | 95.17 | 290 | WP_188728339.1 |
|              |                                   |            | <i>Pseudarthrobacter polychromogenes</i>  | 100 | 94.83 | 290 | WP_188810766.1 |
|              |                                   |            | <i>Pseudarthrobacter chlorophenolicus</i> | 100 | 93.1  | 292 | WP_015939000.1 |
|              |                                   |            | <i>Pseudarthrobacter siccitolerans</i>    | 99  | 93.06 | 295 | WP_050057194.1 |
|              |                                   |            | <i>Pseudarthrobacter enclensis</i>        | 100 | 92.07 | 291 | WP_058269269.1 |
|              |                                   |            | <i>Pseudarthrobacter sulfonivorans</i>    | 100 | 91.41 | 291 | WP_309819042.1 |
| Asphe3_42380 | PCA 4,5-dioxygenase               | pASPHE302  | <i>Arthrobacter</i> sp. FB24              | 100 | 99.54 | 433 | WP_011689793.1 |
|              |                                   |            | <i>Arthrobacter</i> sp. YJM1              | 99  | 94.65 | 439 | WP_305997201.1 |
|              |                                   |            | <i>Pseudarthrobacter sulfonivorans</i>    | 99  | 90.93 | 465 | WP_255769043.1 |
|              |                                   |            | <i>Microbacterium resistens</i>           | 99  | 90.49 | 443 | WP_310020541.1 |
|              |                                   |            | <i>Microbacterium hydrocarbonoxydans</i>  | 99  | 90.93 | 450 | WP_045257717.1 |
|              |                                   |            | <i>Corynebacterium cyclohexanicum</i>     | 99  | 89.77 | 465 | WP_229231144.1 |
| Asphe3_35170 | catechol 1,2-dioxygenase          | chromosome | <i>Arthrobacter</i> sp. BB-1              | 100 | 92.62 | 298 | TNB68529.1     |
|              |                                   |            | <i>Pseudarthrobacter</i> sp. GA104        | 100 | 91.95 | 298 | MUU73784.1     |

|              |                          |            |                                             |     |       |     |                |
|--------------|--------------------------|------------|---------------------------------------------|-----|-------|-----|----------------|
|              |                          |            | <i>Pseudarthrobacter sulfonivorans</i>      | 98  | 92.18 | 294 | MBD1539083.1   |
|              |                          |            | <i>Pseudarthrobacter polychromogenes</i>    | 98  | 91.84 | 294 | WP_188813142.1 |
|              |                          |            | <i>Pseudarthrobacter oxydans</i>            | 100 | 91.28 | 294 | WP_307464326.1 |
|              |                          |            | <i>Pseudarthrobacter defluvii</i>           | 98  | 92.18 | 293 | WP_307491979.1 |
| Asphe3_40510 | catechol 2,3-dioxygenase | pASPHE301  | <i>Actinomycetota bacterium</i>             | 100 | 57.19 | 291 | MDT7726568.1   |
|              |                          |            | <i>Rhodococcus wratislaviensis</i> IFP 2016 | 100 | 56.46 | 293 | ELB89778.1     |
|              |                          |            | <i>Carbobacillusaltaicus</i>                | 100 | 45.64 | 298 | PTQ55801.1     |
|              |                          |            | <i>Pseudaminobacter salicylatoxidans</i>    | 100 | 38.61 | 301 | PWJ76351.1     |
|              |                          |            | <i>Starkeya</i> sp.                         | 100 | 35.76 | 301 | QCS37645.1     |
| Asphe3_22000 | 4HB transporter          | chromosome | <i>Subtercola lobariae</i>                  | 90  | 50.93 | 470 | GGF22968.1     |

**Table S2. Oligonucleotides used for the RT-qPCR and PCR experiments.**

| Gene Locus Tag/<br>Gene Name     | Oligonucleotide<br>Designation | Oligonucleotide Sequence (5'→3') | Product Size<br>(bp) |
|----------------------------------|--------------------------------|----------------------------------|----------------------|
| <b>Asphe3_38860/<i>pca34</i></b> | pca34dioxfor                   | CGTACCCATGGAAGAACCAC             | 248                  |
|                                  | pca34dioxrev                   | GGTCAGGATGATGTCCCAGT             |                      |
| <b>Asphe3_42380/<i>pca45</i></b> | pca45dioxfor                   | ACACCTCGGCACTATTCACC             | 162                  |
|                                  | pca45dioxrev                   | CGTTGTACACCAGGATGACG             |                      |
| <b>Asphe3_35170/<i>cdo12</i></b> | cat12dioxfor                   | AAACGGATACCCGGAAAGAG             | 198                  |
|                                  | cat12dioxrev                   | GGGCGTTGTACTCCTCGTAG             |                      |
| <b>Asphe3_40510/<i>cdo23</i></b> | cat23dioxfor                   | AGCCAGTTCCACCACGATAT             | 182                  |
|                                  | cat23dioxrev                   | CAATACTGGTTTCCGCCGAC             |                      |
| <b>Asphe3_00060/<i>gyrβ</i></b>  | gyrβfor                        | GGCTAACGACAATACAGATA             | 210                  |
|                                  | gyrβrev                        | ACCACTTCATAAACAAGGT              |                      |
